# Supplementary material
Source: PubMed Central journal article supplement (PMC7087172)
Supplement: 705_2016_3208_MOESM1_ESM.pdf [file 705_2016_3208_MOESM1_ESM.pdf]

Supplementary data 1. Primer sets used in the present study.

| Primer                 | Length (bp) | Primer for PCR             |                               |
|------------------------|-------------|----------------------------|-------------------------------|
|                        |             | Forward-5'                 | Reverse-3'                    |
| 1                      | 1494        | ACTTAAGATAGATATTAATATATATC | TCAGCTTTTGTGRTCAAGCA          |
| 2                      | 2474        | GGAACCTTGTCTTGCAAGYA       | CCACAAAAGTCTGCAATTG           |
| 3                      | 1595        | GCATTGGAYGARTTTAAAGA       | TCACAACTGATTTRATACC           |
| 4                      | 1457        | GYCAGTTTGGAYRATCTTAC       | AGCYRCCAGCAACTTCA             |
| 5                      | 1812        | GGATRTAACATGTGAAGTKT       | TCATTAAYAAAMACCCATTG          |
| 6                      | 1361        | AGCTATTGTAGRGGTAGTGT       | CCAGTGTGTAATGCATTAGG          |
| 7                      | 1458        | CCCTGTACTATGCGYTCTA        | GTTGTRCAYTTTACATCACT          |
| 8                      | 1586        | GATCAATATAGGTATATGTGT      | GCTATRTGKGTCTACAATA           |
| 9                      | 1540        | CAACCTTTAGGTAAYTGTGT       | AARCAAGAMGTTCTAAGATC          |
| 10                     | 1549        | ATAGCTACTTGTGGCTATCA       | GCTCCATAACAGCYACAG            |
| 11                     | 1688        | GCCAAACARGGTCTGTWGC        | TCACCTACATACACAACATA          |
| 12                     | 1391        | AATGACACAGGCAAAAAGTA       | GCTYTAGAACCRCAAGAAACA         |
| 13                     | 1463        | GTTTCAGATTGYGTAGTKTTTGT    | CGCTRTAACACTGTGTAGA           |
| 14                     | 1521        | GAAAAYATTCGCACACTRCCA      | TTGCGTGCAGHGTTTTTCCA          |
| 15                     | 1845        | ACAGAGACAAGTTGGCAYGA       | CCWGAAMACTACAACCTGYTG         |
| 16                     | 1799        | AAGAGYGRGTGGCTCTCGTA       | GTAACATYATCTCCTGCAGT          |
| 17                     | 1607        | TGCACCTAATGGYATAGTGT       | GTAATATCGCTGCGACAAGA          |
| 18                     | 1735        | TGWTAGTGTATGGWGCTTT        | GGAATGAARTCCCAACGGAA          |
| 19                     | 1220        | ATGGTATAGTGTGGGTGTCT       | TGSTCTAACTCTAWACTAGC          |
| <b>9106</b>            |             |                            |                               |
| 9106-1                 | 1487        | ACTTAAGTGTGATATAAAATATATC  | GTTTGGTCAAGCAGTGTTAGG         |
| 9106-2M                | 1580        | GTC AATTGTTGTCCTAGCAGC     | CACATGTAGCTGTTTAAAC           |
| 9106-2M-2              | 755         | GAATTCATGGAGACTTGCTCTTC    | GTCTTGATAAGAGCCAAACAC         |
| 9106-2,3 linke         | 471         | TTCTGATGTTCTAGAGAAG        | CGCCATCTACAAGAACATTC          |
| 9106-3M                | 598         | CCGCTCTGTTGTTGTA AAAAC     | GGGCAATTTGAATTTGCGTC          |
| 9106-5                 | 1629        | CTGGACTGGTTGTCAAAC         | AAGACAATGGTCGCATAAGC          |
| 9106-5M                | 1059        | GGAAGCATGAAATGTGAAC        | GGAATGTACCAAGGTTTTCCG         |
| 9106-7M                | 760         | TCTCACTGCCTAAGTGGTTG       | CCTTCTGTATATGCAGTAAG          |
| 9106-8M                | 551         | CACATACCATTATGTCTG         | CATGCTACATTATCCACC            |
| 9106-8,9 linke         | 543         | CTTACAGCTTAAAGGGCATG       | ATCAGGATCACATCCACTAGC         |
| 9106-9M                | 501         | AGCGACCTTTGATGTATG         | GGTTCCGAACTCAATAGC            |
| 9106-12                | 1713        | CACTGCATGTTCTCATGCAGC      | ACAACCGCTCATTATAGCATC         |
| 9106-18                | 2159        | CAATCCGGAATTTGGAACAG       | CTTAGCCTTAGTAATGCGGAG         |
| 9106-14M               | 1441        | GCTACCTAACACACTAAACAC      | GCACTTTGGTAGTAGTACAC          |
| 9106-16-N3             | 616         | TGGTCTGTCTGTGATAAC         | CGTAAGAATAGCACTCTGC           |
| 9106-16-N3.4           | 363         | GGTAGTGAAGACATGTTC         | CCACCATTTTGACAACCTCGTC        |
| <b>11045</b>           |             |                            |                               |
| 11045-1                | 1487        | ACTRAAAATAGATATTAWTATATATC | TTGCGATGCCACGCACAACAACCTGTGTA |
| 11045-2-second         | 2069        | GATGGTGTAAACACCAGATAAAATG  |                               |
| 11045-2-third          | 1375        | GATGTTGAAGATCTGGGTGTTG     |                               |
| 11045-2M3              |             | GGTTCCTGTTGTTGAAGAGTATC    | CTCAATGTGTTCTTGACTCAGAG       |
| 11045-5                | 2141        | CATTATGTCTCCTGAAAGTTGC     | ACCAACAAAACCTGTTGCCATC        |
| 11045-second-F         |             | CACACAGTGGCATGCATTGG       |                               |
| 11045-third-F          |             | GACACAGACTGAGCGAAGACC      |                               |
| 11045-5-R2             |             |                            | CCACGGTCTTCGCTCAGTCTGTGTC     |
| 11045-5M               | 999         | CTAATGTTGTGCCGTCATATGG     | CAAACTACTCCTCTACAATAGCTG      |
| 11045-8                | 1997        | GTGCACACAACCTGTGTTGGC      | CCATGACCTATCCAACACTGAC        |
| 11045-8M               |             | GCTACAGTGCAATCTAAAATTGAG   |                               |
| 11045-9M               | 468         | CGTAATAAGTGTGCACTGTTTGTG   | GTATACTTAGTAAGTCGTTGCC        |
| 11045-11M              | 842         | GTATAGGGCTCCTACAACCTTAC    | CCTACTAAATGGTATAATGGAATG      |
| 11045-12,13 li         | 527         | CAAGTAGGATTCTCAACTGGTG     | GTTGTTAATTGCAAGGCAACGAGTC     |
| 11045-14               | 1657        | GATCAAGGTATTGAAAAGGCAG     | CAAATGTACTATAAGCAGAGG         |
| 11045-14M              | 681         | AGCGTGTGTTACGTTACCTAAC     | CATGTTATGCGGCACACACATTTG      |
| 11045-18               | 2563        | CAGGTGAACAGTTAGTACAAC      | GTACGCTTACAAAATCTGCGATG       |
| 11045-18M              | 835         | GGTCACTGGCTTGTCAAATG       | GATAAATTCGCGCTTTCTTGC         |
| <b>03342 and D7905</b> |             |                            |                               |
| NVQ-6-2T               | 1976        | CATCTTGCCCTCACAGGTCATC     | GTGCAACCAGCAAAGGCTTC          |
| NVQ-6TM-3              | 1307        | GTTACTTTGGAGATACTAC        | TTCTCACGCAAGTACTGTC           |
| NVQ-6-3M4              | 457         | GTGAAAGTCTCTACTCTGTTG      | GCATTTTCCAAAAGTAGG            |
| NVQ-6-4                | 1510        | GTCCTTACTCTGTTGTTAAACAG    | GTGTTTTGGTGACCATAATC          |
| NVQ-6/36-5             | 1552        | CTGAAAAGCTTAAACGCCATG      | TACTCACATACACTACCTC           |
| NVQ-6-7M8              | 481         | TAAGTGTGCTAAGTGGATGTTG     | GCATTAACAACCCAACTAAC          |
| NVQ-6-8M               | 556         | GGTTGAGGTTGTTTACTTG        | CAACGTAATAAGCATACCCAAC        |
| NVQ-6-12               | 1482        | GCTCGTGTGTTTACTGTC         | GTCAAAATCAGCTACCCAAC          |
| NVQ-6/36-14            | 853         | GCACATGTTTCTGTGCTTTTACG    | AGCGCAAAGTAGTCAGTTCTAG        |
| NVQ-36-1M2             | 1267        | CAAAAATAACACCTGGTATCCC     | GTGTGCACTACAGAATTTGAC         |
| NVQ-36-2M3             | 1883        | GAGAAAGCATTTGGCATCTTGTG    | GTAGATGACCTGTGAGACAAG         |
| NVQ-36-2L3             | 1701        | CACCTGAAAAGGTTTTGTGCAC     | CGTGCTTACAAGAATGTTCTTG        |
| NVQ-36-3               |             | GCAAAGACTTGTACACCTTCG      | CGAAGGTGTGACAAGTCTTTGC        |
| NVQ-36-3M              | 1232        | GCTTACAAGAATGTTCTTGTAG     | CCTGCACTTAAAGACTATCATAG       |
| NVQ-36-4               |             |                            | CAAAATCATCAACCAAGCACGC        |
| NVQ-36-6M7             | 819         | GAGGTTGCAACTCAAAATGGTG     | ACAAGACAATAGCACACAACAC        |
| NVQ-36-8               | 2455        | GGATACTTTTCTGTTGCCTAC      | AGGCTCGCTTTACAACATC           |
| NVQ-36-8m              | 2320        | GATACTATGTTACCATGGATG      | CGCTTTACAACATCAGGATCAC        |
| NVQ-36-89R             |             |                            | CAACATCAGGATCACATCCAC         |
| NVQ-36-9M1             | 543         | TGCCGAGATTGTAGTGATGAC      | CTTAGAAGTCACTTCTAGAC          |
| NVQ-36-10              | 2100        | GTGATGACAGGTGTTTGATAC      | AGTATGACATACCTCCGAGGTAC       |
| NVQ-36-11M             | 797         | CTAGTGTGAAAGTGAGAGAAAGTAC  | GTGAACCATTAAGTAAGGTACG        |
| NVQ-36-11n1            | 798         | CTATCATGGGAGCCAGGTA AAAAC  | ACAAAACATAAGGTTTGTGACAAC      |
| NVQ-36-17M             | 1160        | GGCACAGTCTAGACTAATGTTAG    | CTACTTCTCCTGTTGTCTACAC        |
| NVQ-36-18              | 1457        | GAGTGTGTTTGTAGTCTTTTGC     | TCTACTTGGAACTCTACACC          |
| NVQ-36-18M             |             |                            | CCTTGAAATTTAGGAGCAGGTG        |
| NVQ-36-19              | 1472        | GCAACATGGATACTGGAGACC      | CTAAAATTTAGCTCTTCC            |
| <b>8065</b>            |             |                            |                               |
| 8065-9MF               |             | GTGGTACTGAAGATGGAATC       |                               |
| 8065-10MR              |             |                            | GAAGCTGGCGTATATCAAAC          |
| 8065-17m18F            | 942         | GATGTCCAACGAGACAAAATTG     | CATAACCTGCAACAACTTTC          |
| 8065-18m19F            | 955         | GGATTTACAAGCGTTAAGAG       | TGCTCTACTAGATGCTGC            |
| <b>10043</b>           |             |                            |                               |
| 10043-3M4              |             | GATGAAAACGCTGTAGGGAC       | CAACACTAGATCCAACAAC           |
| 10043-6M7              |             | CAGGCTGGTTTTAAGAACTAG      | CTCATCTTCAAATTTATTTG          |
| 10043-8                |             | CTTTGAGTTGGTCCACACTAC      | CTTAGTAAGCCGTTGCCTAC          |
| 10043-9M10             |             | GTTCCGAAACCTTATGGTTG       | GAATTTGGTCTTCAACCTTG          |
| 10043-12               |             | GTAGGTAAACAGAAGCGTAC       | CATACAAAGACCGTCAGCAAAC        |
| 10043-18               |             | GTTTTCTGACAGCAGTTTAC       | CTTAGTACGGGACCAAAGAC          |
